# Supplementary material
Source: publisher figshare collection journal article supplement (https://frontiersin.figshare.com/ndownloader/files/12477659)
Supplement: Supplementary file [file 12477659]

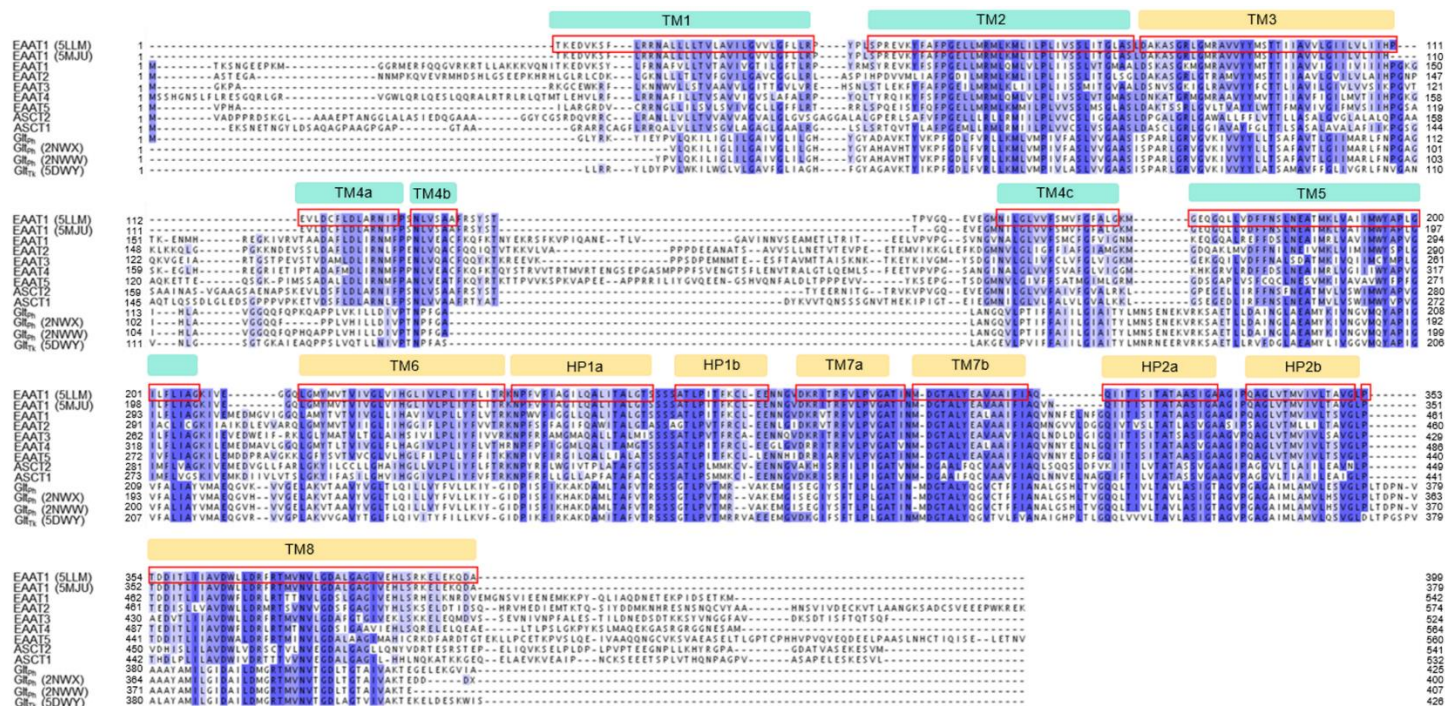

**Supplementary Figure 1.** Multiple sequence alignment of the SLC1 family and prokaryotic homologs. Promals3D alignment visualized in JalView highlighting conserved residues in blue. TM regions denoted according to the EAT1 structure are marked by red boxes. TM helices involved in the mobile transport domain are highlighted in mint green, TM helices comprising the scaffold domain are shown in yellow.
